# Supplementary material for: Pharmaceuticals in Wastewater Treatment Plants: A Systematic Review on the Substances of Greatest Concern Responsible for the Development of Antimicrobial Resistance
Source: Preprints.org preprint supplement (doi:10.20944/preprints202106.0672.v1), 2021-06-28
Supplement: Supplementary file 1 [file supplementary]

## Sheet: Risk of Bias 
Bias Assessment	Bias Score
Authors attempted to analyse all the PRs in WW samples (wide-scope screenings preceded the detection and quantification of examined PRs)	Study	1	2	3	4	5	6	7	8	9	10	11	12	13		Average	0.24	%		Study	1	2	3	4	5	6	7	8	9	10	11	12	13
	Score	0	0	2	0	0	2	0	0	0	0	0	0	0		0 =	22	88		Score	27	18	31	25	24	28	26	26	30	26	22	26	25
	Study	14	15	16	17	18	19	20	21	22	23	24	25			2 =	3	12		Study	14	15	16	17	18	19	20	21	22	23	24	25
	Score	0	0	0	0	0	0	0	0	2	0	0	0							Score	28	22	21	24	28	18	18	31	26	32	28	21
	Yes = 2, Not = 0, unclear = 1
If not, the number of PRs analysed was less or more than 10	Study	1	2	3	4	5	6	7	8	9	10	11	12	13		Average	1.08	%
	Score	2	2	2	1	1	2	1	1	1	1	1	0	0		0 =	6	24																	Average
	Study	14	15	16	17	18	19	20	21	22	23	24	25			2 =	8	32		Study	1	2	3	4	5	6	7	8	9	10	11	12	13		63.1
	Score	1	0	0	1	1	1	0	2	2	2	2	0							Score	67.5	45	77.5	62.5	60	70	65	65	75	65	55	65	62.5
	≤ than 10 = 0, ≥ than 10 = 1, ≥ than 50 = 2 (2 default if yes on the PQ)																			Study	14	15	16	17	18	19	20	21	22	23	24	25
Authors explained the reasons for their selection of PRs, WW, WWTPs	Study	1	2	3	4	5	6	7	8	9	10	11	12	13		Average	1.52	%		Score	70	55	52.5	60	70	45	45	77.5	65	80	70	52.5
	Score	1	1	2	1	1	2	2	1	2	1	1	1	1		0 =	0	0
	Study	14	15	16	17	18	19	20	21	22	23	24	25			2 =	13	52		Low risk of bias	9
	Score	2	2	1	2	2	2	1	2	2	2	2	1							Medium risk of bias	16
	Yes = 2, Not = 0, unclear = 1																			High risk of bias	0
Period of sampling campaigns	Study	1	2	3	4	5	6	7	8	9	10	11	12	13		Average	0.92	%
	Score	2	0	0	1	1	0	1	1	1	1	1	0	1		0 =	6	24
	Study	14	15	16	17	18	19	20	21	22	23	24	25			2 =	4	16
	Score	2	2	1	0	1	0	2	1	1	1	1	1
	≤ 1 week = 0, ≥ 1 week = 1, ≥ 1 year = 2
Composite samples	Study	1	2	3	4	5	6	7	8	9	10	11	12	13		Average	1.56	%
	Score	2	0	2	2	1	2	2	2	2	1	1	2	2		0 =	2	8
	Study	14	15	16	17	18	19	20	21	22	23	24	25			2 =	16	64
	Score	2	1	2	2	2	2	1	2	2	1	0	1
	Yes = 2, Not = 0, unclear = 1
Volume analysed during the detection phase	Study	1	2	3	4	5	6	7	8	9	10	11	12	13		Average	1.16	%
	Score	0	2	1	0	1	2	1	1	1	2	2	1	2		0 =	4	16
	Study	14	15	16	17	18	19	20	21	22	23	24	25			2 =	8	32
	Score	1	1	1	1	2	0	2	0	1	1	2	1
	≤ 50 mL = 0, > 50/unclear = 1, ≥ 250 mL = 2
Samples stored on ice and dark conditions	Study	1	2	3	4	5	6	7	8	9	10	11	12	13		Average	1.6	%
	Score	2	1	2	1	1	2	1	2	2	2	1	2	2		0 =	0	0
	Study	14	15	16	17	18	19	20	21	22	23	24	25			2 =	15	60
	Score	1	2	1	2	2	1	2	2	1	2	2	1
	Yes = 2, Not = 0, unclear = 1
Samples stored for less or more than 24 hours before the analytical phase	Study	1	2	3	4	5	6	7	8	9	10	11	12	13		Average	1.16	%
	Score	1	1	1	1	1	0	1	2	0	1	1	2	2		0 =	3	12
	Study	14	15	16	17	18	19	20	21	22	23	24	25			2 =	7	28
	Score	2	1	1	1	1	0	1	2	2	2	1	1
	≤ 24 hours = 2, ≥ 24 hours/unclear = 1, ≥ 72 hours = 0
Description and correct preparation and preservation of reagents and solutions	Study	1	2	3	4	5	6	7	8	9	10	11	12	13		Average	1.36	%
	Score	2	1	2	2	1	1	1	1	2	2	1	1	1		0 =	0	0
	Study	14	15	16	17	18	19	20	21	22	23	24	25			2 =	9	36
	Score	2	2	2	1	1	1	1	2	1	1	1	1
	Yes = 2, Not = 0, unclear = 1
Solid-Phase Extraction (SPE) during the extraction phase	Study	1	2	3	4	5	6	7	8	9	10	11	12	13		Average	1.96	%
	Score	2	2	2	2	2	2	2	2	2	1	2	2	2		0 =	0	0
	Study	14	15	16	17	18	19	20	21	22	23	24	25			2 =	24	96
	Score	2	2	2	2	2	2	2	2	2	2	2	2
	Yes = 2, Not = 0, unclear = 1
Gas or Liquid chromatography coupled with mass spectrometry	Study	1	2	3	4	5	6	7	8	9	10	11	12	13		Average	1.68	%
	Score	2	2	2	2	2	2	2	0	2	2	2	2	2		0 =	4	16
	Study	14	15	16	17	18	19	20	21	22	23	24	25			2 =	21	84
	Score	2	0	2	2	2	2	0	2	2	2	2	0
	Yes = 2, Not = 0, unclear = 1
Validation of analytical method (MDL or LOD, MQL or LOQ, recovery)	Study	1	2	3	4	5	6	7	8	9	10	11	12	13		Average	1.44	%
	Score	2	0	2	2	0	2	2	2	2	2	0	2	0		0 =	7	28
	Study	14	15	16	17	18	19	20	21	22	23	24	25			2 =	18	72
	Score	2	2	0	2	2	2	0	2	0	2	2	2
	Yes = 2, Not = 0, unclear = 1
Missing data	Study	1	2	3	4	5	6	7	8	9	10	11	12	13		Average	1.24	%
	Score	0	0	2	2	2	2	0	2	2	0	2	2	2		0 =	9	36
	Study	14	15	16	17	18	19	20	21	22	23	24	25			2 =	15	60
	Score	2	0	0	2	1	0	0	2	0	2	2	2
	Yes = 0, Not = 2, unclear = 1
If so, authors explained with appropriate reasons the lack of data	Study	1	2	3	4	5	6	7	8	9	10	11	12	13		Average	1.4	%
	Score	2	0	2	2	2	2	0	2	2	0	2	2	2		0 =	7	28
	Study	14	15	16	17	18	19	20	21	22	23	24	25			2 =	17	68
	Score	2	0	0	2	1	0	0	2	2	2	2	2
	Yes = 2, Not = 0, unclear = 1 (2 default if not applicable)
Presentation and description of Statistical Analyses	Study	1	2	3	4	5	6	7	8	9	10	11	12	13		Average	0.68	%
	Score	0	0	0	0	2	0	2	2	2	0	0	2	0		0 =	15	60
	Study	14	15	16	17	18	19	20	21	22	23	24	25			2 =	7	28
	Score	0	1	0	0	2	0	0	1	1	0	2	0
	Yes = 2, Not = 0, unclear = 1
Authors reported only statistically significant data	Study	1	2	3	4	5	6	7	8	9	10	11	12	13		Average	1.28	%
	Score	1	1	1	1	1	1	2	1	1	2	1	1	2		0 =	0	0
	Study	14	15	16	17	18	19	20	21	22	23	24	25			2 =	7	28
	Score	1	2	1	1	1	1	2	2	1	2	1	1
	Yes = 0, Not = 2, unclear = 1
Standard Deviation values represented	Study	1	2	3	4	5	6	7	8	9	10	11	12	13		Average	0.8	%
	Score	0	0	0	1	1	0	2	0	0	2	0	1	2		0 =	11	44
	Study	14	15	16	17	18	19	20	21	22	23	24	25			2 =	6	24
	Score	1	2	1	1	1	0	2	1	0	2	0	0
	Yes = 2, Not = 0, unclear = 1
Authors selectively reported only a part of the results	Study	1	2	3	4	5	6	7	8	9	10	11	12	13		Average	1.36	%
	Score	2	2	2	2	2	2	0	2	2	2	0	2	0		0 =	8	32
	Study	14	15	16	17	18	19	20	21	22	23	24	25			2 =	17	68
	Score	2	0	2	0	2	2	0	0	2	2	0	2
	Yes = 0, Not = 2, unclear = 1
Risk assessment of PRs (RQ)	Study	1	2	3	4	5	6	7	8	9	10	11	12	13		Average	0.96	%
	Score	2	2	2	0	0	0	2	0	2	2	2	0	0		0 =	13	52
	Study	14	15	16	17	18	19	20	21	22	23	24	25			2 =	12	48
	Score	0	0	2	0	0	0	0	2	0	2	2	2
	Yes = 2, Not = 0, unclear = 1
Status of funding	Study	1	2	3	4	5	6	7	8	9	10	11	12	13		Average	1.84	%
	Score	2	1	2	2	2	2	2	2	2	2	2	1	2		0 =	0	0
	Study	14	15	16	17	18	19	20	21	22	23	24	25			2 =	21	84
	Score	1	2	2	2	2	2	2	2	2	2	2	1
	Clear = 2, unclear = 1
																Recurrent Bias < 0.1
																High protection from bias >1.5
Studies Included for the Critical Apprisal: 1. Rodriguez-Mozaz, S., Vaz-Moreira, I., Varela Della Giustina, S., Llorca, M., Barceló, D., Schubert, S., Berendonk, T.U., Michael-Kordatou, I., Fatta-Kassinos, D., Martinez, J.L., Elpers, C., Henriques, I., Jaeger, T., Schwartz, T., Paulshus, E., O'Sullivan, K., Pärnänen, K.M.M., Virta, M., Do, T.T., Walsh, F. and Manaia, C.M. (2020), "Antibiotic resi…

## Sheet: Influents
4												5						6						7								8									9						10
Concentration and reduction of antibiotic residues in selected wastewater treatment plants and receiving waterbodies in Durban, South Africa	PRs concentrations influent (standard deviation, if applicable) Conc in ng/L.	PRs	I Average	I SD	K Average	K SD	S Average	S SD	P Average	P SD		Diverse and abundant antibiotics and antibiotic resistance genes in an urban water system	PRs concentrations influent (standard deviation, if applicable) Conc in ng/L.	PRs	IW (WINTER)	IW (SPRING)		Elimination of polar micropollutants and anthropogenic markers by wastewater treatment in Beijing, China	PRs concentrations influent (standard deviation, if applicable) Conc in ng/L.	PRs	Average of 5 WWTPs MIN	Average of 5 WWTPs2 MAX		Environmental Risk and Risk of Resistance Selection Due to Antimicrobials’ Occurrence in Two Polish Wastewater Treatment Plants and Receiving Surface Water	PRs concentrations influent (standard deviation, if applicable) Conc in ng/L.	PRs	WWTP1	SD	WWTP2	SD2		Hospital Exploring the correlations between antibiotics and antibiotic resistance genes in the wastewater treatment plants of hospitals in Xinjiang, China	PRs concentrations influent (standard deviation, if applicable) Conc in ng/L.	PRs	E1	R1	S1	X1	M1		Micropollutants in Lake Como water in the context of circular economy: A snapshot of water cycle contamination in a changing pollution scenario	PRs concentrations influent (standard deviation, if applicable) Conc in ng/L.	PRs	WWTP Como IN (P8)	WWTP Chiasso IN (P10)		Occurrence and environmental impact of pharmaceutical residues from conventional and natural wastewater treatment plants in Gran Canaria (Spain)	PRs concentrations influent (standard deviation, if applicable) Conc in ng/L.	PRs
https://doi.org/10.1016/j.scitotenv.2019.04.410		Azithromycin	17	±40.2	102.1	±84.9	90.9	±175.3	10	±22.6		https://doi.org/10.1016/j.jenvman.2018.10.051		Azithromycin	63.2	148.7		http://dx.doi.org/10.1016/j.chemosphere.2014.09.027		Clarithromycin	130	260		doi:10.3390/molecules25061470		Azithromycin	87	±71	360	±450		DOI 10.1007/s11356-016-6688-z		Chlortetracycline	23.6	12.9	35.5	27.4	16.4		https://doi.org/10.1016/j.jhazmat.2019.121441		Clarithromycin	619.48	401.66		http://dx.doi.org/10.1016/j.scitotenv.2017.05.058		Ciprofloxacin
		Ciprofloxacin	35341.1	±16059.9	81732.2	±22248.6	88011.8	±160115.1	41502.7	±23405.7				Ciprofloxacin	<MDL	<MDL				Erythromycin	330	390				Ciprofloxacin	1260	±680	4300	±4300				Ciprofloxacin	197	163	227	345	246				Erythromycin	<LOQ	<LOQ				Erythromycin
		Clarithromycin	497.5	±665.5	788.2	±444.5	72.7	±106.9	2822.8	±3046				Clarithromycin	65	86.3				Fluconazole	110	170				Clarithromycin	480	±190	560	±590				Norfloxacin	447	541	778	554	624				Dehydro-Erythromycin	26.14	19.73				Metronidazole
		Clindamycin	13.4	±11.1	41.1	±21.9	14.9	±22.5	8.4	±4.3				Erythromycin	<MDL	<MDL				Metronidazole	140	380				Clindamycin	134	±87	106	±51				Ofloxacin	678	845	894	783	942				Lincomycin	4.68	1.43				Ofloxacin
		Erythromycin	58.6	±65.4	40.3	±16	23.2	±22.7	5.5	±6.5				Flumequine	19.4	26.5				N4-Acetylsulfamethoxazole	460	640				Erythromycin	58	±71	28	±20				Oxytetracycline	237	341	187	448	376				Sulfamethoxazole	81.76	60.34				Sulfamethoxazole
		Ethionamide	11	±12.4	22.2	±20.5	38.3	±60.4	25.8	±26.1				Metronidazole	<MDL	2.1				SMX + N4-AcSMXc	810	1100				Lincomycin	20	±15	102	±46				Sulfadiazine	368	521	177	477	574				Vancomycin	131.57	<LOQ				Trimethoprim
		Metronidazole	13.6	±16	30.9	±23	20656.1	±54279.2	102.8	±138.5				Nalidixic acid	12	5				Sulfadiazine	190	320				Metronidazole	250	±160	7400	±9600				Sulfamethazine	20.6	15.3	31.2	22.6	17.4
		Norfloxacin	63.8	±62.1	61.6	±58.9	143.4	±89.4	45.3	±22.9				Oxytetracycline	121.6	92.6				Sulfamethazine	10	20				Norfloxacin	240	±130	80	±110				Tetracycline	174	374	124	255	294
		Ofloxacin	2078.3	±1017.8	5741.7	±2433.9	1578.5	±2534.4	1817.6	±731.5				Roxithromycin	155.6	106				Sulfamethoxazole	300	460				Ofloxacin	135	±35	195	±21
		Roxithromycin	467.1	±808	70.3	±39.5	23.8	±30.8	1275.6	±1915				Sulfamethoxazole	483.4	187.2				Trimethoprim	300	370				Oxytetracycline	0.7	±0.9	<MDL	<MDL
		Sulfamethoxazole	1171.8	±981.4	4569.3	±2216.5	845.3	±1274.2	1681.4	±2837.7				Tetracycline	26.2	<MDL										Rifampicin	5.2	±3.3	5.3	±3.4
		Trimethoprim	1926.9	±2564.8	590.2	±327.4	1400.6	±2815.5	400	±374.8				Tinidazole	<MDL	<MDL										Roxithromycin	18	±19	6.2	±5.3
														Trimethoprim	34.6	31.4										Sulfadiazine	<MDL	<MDL	<MDL	<MDL
																										Sulfamethoxazole	1300	±460	3000	±1900
																										Tetracycline	190	±190	210	±160
																										Trimethoprim	254	±41	900	±770
		Occurring in more than 50% of the studies																								Vancomycin	350	±390	3200	±3600
		Occurring in more than 25% of the studies
Studies After the Critical Appraisal (to avoid confusion, the reference number is the same as before the Critical Appraisal, and it does NOT correspond with the reference number of the paper): 1. Rodriguez-Mozaz, S., Vaz-Moreira, I., Varela Della Giustina, S., Llorca, M., Barceló, D., Schubert, S., Berendonk, T.U., Michael-Kordatou, I., Fatta-Kassinos, D., Martinez, J.L., Elpers, C., Henriques, I…
[truncated: 60 more columns]

## Sheet: Effluents
1																	2							3																4								5
Antibiotic residues in final effluents of European wastewater treatment plants and their impact on the aquatic environment	PRs concentrations effluent (standard deviation, if applicable) Conc in ng/L.	PRs	PT1	PT2	PT3	ES1	CYP1	CYP2	IL1	IL2	DE1	DE2	FI1	FI2	NO1		Hospital Characterization and toxicity of hospital wastewaters in Turkey	PRs concentrations effluent (standard deviation, if applicable) Conc in ng/L.	PRs	MFH1	MFH2	TRH		Characterization of wastewater effluents in the Danube River Basin with chemical screening, in vitro bioassays and antibiotic resistant genes analysis	PRs concentrations effluent (standard deviation, if applicable) Conc in ng/L.	PRs	Bucharest	Cluj	Sabac	Zagreb	Varazdin	Ljubljana	Budapest	Vipap	Zilina	Brno	Amstetten	Augsburg		Concentration and reduction of antibiotic residues in selected wastewater treatment plants and receiving waterbodies in Durban, South Africa	PRs concentrations effluent (standard deviation, if applicable) Conc in ng/L.	PRs	I Average	K Average	S Average	P Average		Diverse and abundant antibiotics and antibiotic resistance genes in an urban water system	PRs concentrations effluent (standard deviation, if applicable) Conc in ng/L.
https://doi.org/10.1016/j.envint.2020.105733		Ampicillin	<MDL	<MDL	<MDL	<MDL	<MDL	<MDL	99.4	68.1	<MDL	<MDL	<MDL	<MDL	<MDL		DOI 10.1007/s10661-016-5732-2		N4-Acetylsulfamethoxazole	7300	580	<0.01		https://doi.org/10.1016/j.envint.2019.03.060		Amoxicillin	58.2	<LOD	<LOD	<LOD	40.1	<LOD	<LOD	<LOD	<LOD	<LOD	<LOD	<LOD		https://doi.org/10.1016/j.scitotenv.2019.04.410		Azithromycin	0.7	<MDL	<MDL	0.1		https://doi.org/10.1016/j.jenvman.2018.10.051
		Azithromycin	361.8	597.5	178.9	299.5	48	45.2	266.7	260.8	126.2	290.4	129.3	130.7	149.7				Azithromycin	400	<0.01	<0.01				Azithromycin	0.3	3.8	14.4	14.9	<LOD	9.8	11.3	<LOD	7.4	12.1	5	1.8				Ciprofloxacin	262.6	211.6	707.6	61.2
		Cefalexin	38.4	37	<MDL	65.2	66.3	65	66.4	87.6	<MDL	<MDL	203.3	308	60.7				Ceftazidime	1600	NA	NA				Chloramphenicol	97.2	<LOD	<LOD	<LOD	<LOD	<LOD	<LOD	<LOD	<LOD	<LOD	<LOD	<LOD				Clarithromycin	0.2	37.7	13.2	2.8
		Ciprofloxacin	457.3	584.9	231.4	200.3	316.8	252.3	259.8	234	43.8	230.6	38.4	43.2	159.2				Cilastatin	4100	<0.01	<0.01				Ciprofloxacin	73.2	41.6	90.8	63.3	22.4	60.8	45.1	<LOD	32.5	15.6	27.4	11.7				Clindamycin	1	8.1	0.5	1
		Clarithromycin	74.2	118.7	313.2	112	<MDL	11.9	204.4	189.4	76.5	123.4	4.5	4.8	20.8				Ciprofloxacin	1900	24000	2100				Clarithromycin	166	353.2	214.2	102.6	25.4	706.8	77.5	3	120	187.8	35.5	25.1				Erythromycin	1.3	3.8	18.2	0.1
		Clindamycin	8.5	86.6	31.5	101.4	6.5	27.8	42.5	59.1	<MDL	110.7	88.8	94.2	97.1				Clarithromycin	350	15000	63				Clindamycin	<LOD	13.2	12.2	6.4	<LOD	<LOD	8.2	<LOD	3.6	8.6	11.3	4				Ethionamide	9.3	0.2	3.5	4.9
		Metronidazole	<MDL	<MDL	<MDL	76.1	19.6	<MDL	88.6	78.2	7.6	20.3	20.1	41.9	93.2				Clindamycin	36	<0.01	<0.01				Erythromycin	50.2	195.1	764.1	48.2	<LOD	19.9	49	<LOD	41.1	46.7	81.1	41				Metronidazole	13.1	1.2	17.9	6.9
		Nalidixic Acid	<MDL	<MDL	<MDL	<MDL	<MDL	<MDL	50.3	25.3	<MDL	<MDL	<MDL	<MDL	<MDL				Metronidazole	<0.03	3000	680				Fluconazole	21.9	119.5	<LOD	25.9	<LOD	24.2	53.9	<LOD	12.9	34	13.6	<LOD				Norfloxacin	1.1	<MDL	0.5	0.8
		Ofloxacin	89.7	184.9	132.8	142.3	305.1	196.7	65.4	39.9	<MDL	66.5	20	22.8	27.1				Ofloxacin	82	1400	200000				Flumequine	14.1	25.8	<LOD	8.3	<LOD	62.7	9.7	<LOD	3.8	44.4	5	10.4				Ofloxacin	15.4	65.6	43.5	9.3
		Oxolinic Acid	<MDL	<MDL	<MDL	<MDL	<MDL	<MDL	<MDL	5.3	<MDL	<MDL	<MDL	<MDL	<MDL				Sulfadiazine	160	<0.01	<0.01				Lincomycin	2.6	2.1	6.9	7.5	1.8	32.7	11.4	<LOD	1.5	10	2.7	2.6				Roxithromycin	<MDL	<MDL	<MDL	<MDL
		Sulfamethoxazole	30.2	7.1	<MDL	123.4	13.3	68.5	53	44	22.9	34.9	<MDL	<MDL	48.6				Sulfamethoxazole	8500	550	<0.01				Metronidazole	5.3	10.6	<LOD	4.2	<LOD	<LOD	4.4	<LOD	<LOD	<LOD	<LOD	<LOD				Sulfamethoxazole	353.9	238.9	124.9	59.3
		Tetracycline	231.2	165.7	147.5	<MDL	36.9	24.5	141	194.2	<MDL	15.4	70.6	16.8	179.2				Trimethoprim	2200	180	<0.01				Minocycline	112.1	41.7	20.9	155.2	202.2	197.4	107.2	62	111.1	114.5	127.6	210.2				Trimethoprim	12.1	9.9	161.8	9.6
		Trimethoprim	69.1	146.3	190.6	102.8	74.2	44	141.3	121	15.2	105	182	186.7	119.7											N-Desmethyl-Clarithromycin	<LOD	46.3	82.4	<LOD	<LOD	<LOD	19.4	<LOD	<LOD	49.7	18.7	<LOD
																										Norfloxacin	<LOD	40.2	39.6	221.7	87.8	40.2	33	<LOD	53	<LOD	<LOD	<LOD
																										Ofloxacin	191.4	162.4	448.5	62.1	20.2	3050.7	303.5	17.6	23.7	15.5	85	28.5
																										Oxolinic acid	6.6	23.5	<LOD	8	<LOD	60	8.9	<LOD	<LOD	40.9	4.6	8.6
		Nalidixic Acid	These PRS were not rejected notwithstanding not present in the list, since evidence of bacterial resistance were founded in the literature (Guardabassi et al., 2000; Yamagishi et al., 1986)																Sulfadiazine	This PR was not rejected notwithstanding not present in the list, since evidence of bacterial resistance were founded in the literature (Heuer & Smalla, 2007)						Rifaximin	12.2	3.8	<LOD	<LOD	<LOD	<LOD	<LOD	<LOD	<LOD	<LOD	<LOD	<LOD
		Oxolinic Acid																								Sulfadiazine	3.5	7.3	<LOD	2.2	1.7	<LOD	10.8	<LOD	1.5	8.5	<LOD	1.1
																										Sulfadimidine	3	4.3	26.7	5.6	3.9	3	105.9	7.2	9.5	23.4	7.3	4.5				Ethionamide	This PR was not rejected notwithstanding not present in the list, since evidence of bacterial resistance were founded in the literature (Heuer & Smalla, 2004)
																										Sulfamethoxazole	2.4	10.8	43	5.9	4.7	7	6	3.9	6.4	41.6	1.5	4.3
																										Triclosan	0.9	7.4	3.9	1.3	<LOD	1.7	4.2	<LOD	<LOD	3.3	1.6	1.8
																										Trimethoprim	60.5	130.6	77.5	108.5	14.7	194.4	45.4	39.3	15.1	47.3	8.7	54.3
			Occurring in more than 50% of the studies
			Occurring in more than 25% of the studies
REFERENCES GUARDABASSI, L., DALSGAARD, A., RAFFATELLU, M. & OLSEN, J.E., 2000. Increase in the prevalence of oxolinic acid resistant Acinetobacter spp. observed in a stream receiving the effluent from a freshwater trout farm following the treatment with oxolinic acid-medicated feed. Aquaculture. 188(3-4), pp. 205-218. YAMAGISHI, J., YOSHIDA, H., YAMAYOSHI, M. & NAKAMURA, S., 1986. Nalidixic acid-…
Studies After the Critical Appraisal (to avoid confusion, the reference number is the same as before the Critical Appraisal, and it does NOT correspond with the reference number of the paper): 1. Rodriguez-Mozaz, S., Vaz-Moreira, I., Varela Della Giustina, S., Llorca, M., Barceló, D., Schubert, S., Berendonk, T.U., Michael-Kordatou, I., Fatta-Kassinos, D., Martinez, J.L., Elpers, C., Henriques, I…
[truncated: 123 more columns]

## Sheet: Removals
4									6						10
Concentration and reduction of antibiotic residues in selected wastewater treatment plants and receiving waterbodies in Durban, South Africa	Removal efficiencies (%)	PRs	I Average	K Average	S Average	P Average	Column1		Elimination of polar micropollutants and anthropogenic markers by wastewater treatment in Beijing, China	Removal efficiencies (%)	PRs	Average of MIN values 5 WWTPs	Average of MAX values 5 WWTPs		Occurrence and environmental impact of pharmaceutical residues from conventional and natural wastewater treatment plants in Gran Canaria (Spain)	Removal efficiencies (%)	PRs	WWTP1	WWTP2
https://doi.org/10.1016/j.scitotenv.2019.04.410		Azithromycin	ND	100	93	47	47		http://dx.doi.org/10.1016/j.chemosphere.2014.09.027		Clarithromycin	-22	41		http://dx.doi.org/10.1016/j.scitotenv.2017.05.058		Ciprofloxacin	96.7	99.9
		Ciprofloxacin	100	100	94	99	94				Erythromycin	19	28				Erythromycin	99.9	–
		Clarithromycin	100	96	26	100	26				Fluconazole	<10	<10				Metronidazole	99.9	99.9
		Clindamycin	100	98	97	87	87				Metronidazole	-320	33				Ofloxacin	99.9	99.9
		Erythromycin	-193	94	-25	55	55				N4-Acetylsulfamethoxazole	50	92				Sulfamethoxazole	99.9	-504.2
		Ethionamide	86	100	88	57	57				SMX + N4-AcSMXc	52	82				Trimethoprim	84.6	99.9
		Metronidazole	79	88	73	75	73				Sulfadiazine	44	74
		Norfloxacin	100	94	98	97	94				Sulfamethazine	63	100
		Ofloxacin	100	98	85	99	85				Sulfamethoxazole	33	72
		Roxithromycin	100	99	39	100	39				Trimethoprim	<1	35
		Sulfamethoxazole	100	95	30	51	30
		Trimethoprim	58	99	21	96	21
Studies After the Critical Appraisal (to avoid confusion, the reference number is the same as before the Critical Appraisal, and it does NOT correspond with the reference number of the paper): 1. Rodriguez-Mozaz, S., Vaz-Moreira, I., Varela Della Giustina, S., Llorca, M., Barceló, D., Schubert, S., Berendonk, T.U., Michael-Kordatou, I., Fatta-Kassinos, D., Martinez, J.L., Elpers, C., Henriques, I…
				24	Doxycycline	24.1	28.9
				24	Oxytetracycline	89.3	84.4
				24	Tetracycline	N/A	92.3
				24	Trimethoprim	83.2	73.7

## Sheet: Risk assessment
1																	2							3					7												9						10
Antibiotic residues in final effluents of European wastewater treatment plants and their impact on the aquatic environment	Risk assessment	PRs	PT1	PT2	PT3	ES1	CYP1	CYP2	IL1	IL2	DE1	DE2	FI1	FI2	NO1		Characterization and toxicity of hospital wastewaters in Turkey	Risk assessment	PRs	MFH1	MFH2	TRH		Characterization of wastewater effluents in the Danube River Basin with chemical screening, in vitro bioassays and antibiotic resistant genes analysis	Risk assessment	PRs	All		Environmental Risk and Risk of Resistance Selection Due to Antimicrobials’ Occurrence in Two Polish Wastewater Treatment Plants and Receiving Surface Water	Risk assessment	PRs	WWTP1 Cyanobacteria	WWTP2 Cyanobacteria	WWTP1 Eukaryote	WWTP2 Eukaryote			PNEC Cyano	PNEC Euka		Micropollutants in Lake Como water in the context of circular economy: A snapshot of water cycle contamination in a changing pollution scenario	Risk assessment	PRs	WWTP Como OUT (P8)	WWTP Chiasso OUT (P10)		Occurrence and environmental impact of pharmaceutical residues from conventional and natural wastewater treatment plants in Gran Canaria (Spain)	Risk assessment	PRs
https://doi.org/10.1016/j.envint.2020.105733		Ampicillin	0	0	0	0	0	0	0	0	0	0	0	0	0		DOI 10.1007/s10661-016-5732-2		N4-Acetylsulfamethoxazole	NC	NC	NC		https://doi.org/10.1016/j.envint.2019.03.060		Clarithromycin	1.47		doi:10.3390/molecules25061470		Azithromycin	12.1053	34.2105	1.27778	3.61111		Azithromycin	19	180		https://doi.org/10.1016/j.jhazmat.2019.121441		Clarithromycin	0.28	16.66		http://dx.doi.org/10.1016/j.scitotenv.2017.05.058		Ciprofloxacin
		Azithromycin	0.48	0.93	0.13	1.37	0.72	0.61	0.14	0.12	0.72	0.95	0.01	0.01	0				Azithromycin	0.07	NC	NC				Ofloxacin	2.58				Ciprofloxacin	0.325664	0.552212	0.184	0.312		Ciprofloxacin	565	1000				Dehydro-Erythromycin	0.04	1.6				Erythromycin
		Cefalexin	0.02	0.03	0	0.1	0.31	0.38	0.01	0.01	0	0	0	0.01	0				Ceftazidime	0.213	NC	NC									Clarithromycin	1.90476	1.70238	4	3.575		Clarithromycin	84	40				Lincomycin	<0.001	0.03				Metronidazole
		Ciprofloxacin	0.2	0.32	0.09	0.22	2.02	1.03	0.04	0.03	0.05	0.3	0	0	0				Cilastatin	NC	NC	NC									Clindamycin	n.d.	n.d.	n.d.	n.d.		Clindamycin	n.d.	n.d.				Sulfamethoxazole	0.002	0.14				Ofloxacin
		Clarithromycin	0.06	0.03	0.04	0.09	0	0.1	0.02	0.01	0.06	0.07	0	0	0				Ciprofloxacin	0.176	1.727	<0.001									Erythromycin	0.105	0.08	0.101942	0.0776699		Erythromycin	200	206										Sulfamethoxazole
		Clindamycin	0.01	0.02	0.01	0.07	0.02	0.07	0.01	0.01	0	0.05	0	0	0				Clarithromycin	0.058	1.943	<0.001									Lincomycin	0.0266667	0.0311111	0.00437318	0.00510204		Lincomycin	1800	10976										Trimethoprim
		Metronidazole	0	0	0	0.04	0.1	0	0.01	0.01	0.01	0.02	0	0	0				Clindamycin	<0.001	NC	NC									Metronidazole	n.d.	n.d.	1.38e-05	1.76e-05		Metronidazole	n.d.	5000000
		Nalidixic Acid	0	0	0	0	0	0	0	0	0	0	0	0	0				Metronidazole	NC	<0.001	<0.001									Norfloxacin	0.19375	0.0625	0.0103333	0.00333333		Norfloxacin	160	3000
		Ofloxacin	0	0.01	0.01	0.02	0.18	0.15	0	0	0	0.01	0	0	0				Ofloxacin	0.012	0.165	0.127				The Risk Score is the linear combination of the indicators scaled from 0 to 1. Only compounds with a priority ranking value of>1.01 were listed. For the remaining substances, risk was assumed to be negligible. More details about the prioritization scheme used can be found in the					Ofloxacin	0.052	0.08	0.0416667	0.0641026		Ofloxacin	500	624
		Oxolinic Acid	0	0	0	0	0	0	0	0.01	0	0	0	0	0				Sulfadiazine	0.004	NC	NC									Oxytetracycline	0.000322581	0.000322581	2.73224e-05	2.73224e-05		Oxytetracycline	310	3660
		Sulfamethoxazole	0	0	0	0.01	0.01	0.06	0	0	0	0.01	0	0	0				Sulfamethoxazole	0.189	0.01	NC									Rifampicin	n.d.	n.d.	n.d.	n.d.		Rifampicin	n.d.	n.d.										RQwith a value b0.1 indicates minimum risk to the organisms, the range between 0.1 and 1 implies medium risk and an RQ of 1 implies high risk
		Tetracycline	0.01	0.01	0	0	0.03	0.02	0	0	0	0	0	0	0				Trimethoprim	1.264	0.08	NC									Roxithromycin	n.d.	n.d.	0.066	0.062		Roxithromycin	n.d.	100
		Trimethoprim	0.01	0.01	0.01	0.01	0.05	0.04	0	0	0	0.01	0	0	0																Sulfadiazine	8.71795e-06	1.53846e-06	0.00125926	0.000222222		Sulfadiazine	390000	2700
																															Sulfamethoxazole	1.0678	1.30508	0.63	0.77		Sulfamethoxazole	590	1000										_ : Missing value of PNEC.
																															Tetracycline	0.00433333	0.00677778	0.0065	0.0101667		Tetracycline	9000	6000
		RQ ≤ 0.1: Low; 0.1 < RQ ≤ 1: Moderate; RQ > 1: High. Values																	According to the authors: NA not analyzed, – not available, NC no calculation possible												Trimethoprim	0.0011782	0.00162003	0.008	0.011		Trimethoprim	135800	20000
																															Vancomycin	n.d.	n.d.	n.d.	n.d.		Vancomycin	n.d.	n.d.
		The Risk quotients were calculated according to the European Community guidelines (EC TGD, 2003), using Eq. (1): RQ = (PEC)/(PNEC). All the other studies 6 studies reported the RQ using Eq. (2): RQ = (MEC)/(PNEC). Thus, since: PEC = (MEC)/(DF). And in order to compare the studies, the RQ value were multiplied for the relative Diluition Factor.																	Insignificant risk (HQ < 0.1), low risk (0.1 < HQ < 1), moderate risk (1 < HQ < 10), and and high risk (HQ > 10).
												Country	Acronym	Dilution Factor (DF)
												Norway	NO	2453.29
												Finland	FI	1702.28
												Ireland	IL	229.76
												Portugal	PT	61.23																	Deduced from the concentrations of the effluents and the values of the study. RQ < 0.1, minimal risk; 1 > RQ 0.1, medium risk; and RQ > 1, high risk. n.d., no data available.
												Germany	DE	32.3
												Spain	ES	25.92
												Cyprus *	CYP	5.86
			PT1	PT2	PT3	ES1	CYP1	CYP2	IL1	IL2	DE1	DE2	FI1	FI2	NO1
		Ampicillin	0	0	0	0	0	0	0	0	0	0	0	0	0
		Azithromycin	29.3904	56.9439	7.9599	35.5104	4.2192	3.5746	32.1664	27.5712	23.256	30.685	17.0228	17.0228	0
		Cefalexin	1.2246	1.8369	0	2.592	1.8166	2.2268	2.2976	2.2976	0	0	0	17.0228	0
		Ciprofloxacin	12.246	19.5936	5.5107	5.7024	11.8372	6.0358	9.1904	6.8928	1.615	9.69	0	0	0
		Clarithromycin	3.6738	1.8369	2.4492	2.3328	0	0.586	4.5952	2.2976	1.938	2.261	0	0	0
		Clindamycin	0.6123	1.2246	0.6123	1.8144	0.1172	0.4102	2.2976	2.2976	0	1.615	0	0	0
		Metronidazole	0	0	0	1.0368	0.586	0	2.2976	2.2976	0.323	0.646	0	0	0
		Nalidixic Acid	0	0	0	0	0	0	0	0	0	0	0	0	0
		Ofloxacin	0	0.6123	0.6123	0.5184	1.0548	0.879	0	0	0	0.323	0	0	0
		Oxolinic Acid	0	0	0	0	0	0	0	2.2976	0	0	0	0	0
		Sulfamethoxazole	0	0	0	0.2592	0.0586	0.3516	0	0	0	0.323	0	0	0
		Tetracycline	0.6123	0.6123	0	0	0.1758	0.1172	0	0	0	0	0	0	0
		Trimethoprim	0.6123	0.6123	0.6123	0.2592	0.293	0.2344	0	0	0	0.323	0	0	0
Studies After the Critical Appraisal (to avoid confusion, the reference number is the same as before the Critical Appraisal, and it does NOT correspond with the reference number of the paper): 1. Rodriguez-Mozaz, S., Vaz-Moreira, I., Varela Della Giustina, S., Llorca, M., Barceló, D., Schubert, S., Berendonk, T.U., Michael-Kordatou, I., Fatta-Kassinos, D., Martinez, J.L., Elpers, C., Henriques, I…
[truncated: 20 more columns]

## Sheet: PRs list
All				1.Angtifungals (CDC, 2020; NHS, 2020)			2.PCPs (Yadav, 2019)		3.1Antibiotic (WHO, 2019)			3.2Antibiotic (CDC, 2019)			Others, see references
218
				Amphotericin			2-Ethyl-hexyl-4-trimethoxycinnamate		Amikacin	Faropenem		Carbapenem			Ethionamide
				Amphotericinb			4MBC		Amoxicillin	Fleroxacin		Methicillin			Marbofloxacin
				Anidulafungin			Parabens(alkyl-p-hydroxybenzoates)		Ampicillin	Flomoxef					N4-Acetylsulfamethoxazole
				Caspofungin			Triclocarban		Antibiotic	Flucloxacillin					Nalidixic Acid
				Clotrimazole			Triclosan		Arbekacin	Flumequine					N-Desmethyl-Clarithromycin
				Econazole					Azithromycin	Fosfomycin					Oxolinic acid
				Fluconazole					Azlocillin	FusidicAcid					Sulfadiazine
				Flucytosine					Aztreonam	Garenoxacin					Sulfadimidine
				Griseofulvin					Bacampicillin	Gatifloxacin					Sulfadoxine
				Isavuconazonium					Benzathinebenzylpenicillin	Gemifloxacin					Sulfamethazine
				Itraconazole					Benzylpenicillin	Gentamicin					Tinidazole
				Ketoconazole					Biapenem	Imipenem					Erythromycin-H2O
				Micafungin					Carbenicillin	Isepamicin					Sulfisoxazole
				Miconazole					Cefacetrile	Josamycin					Sulfamerazine
				Nystatin					Cefaclor	Kanamycin					Sulfathiazole
				Posaconazole					Cefadroxil	Latamoxef
				Terbinafine					Cefalexin	Levofloxacin
				Voriconazole					Cefalotin	Lincomycin
									Cefamandole	Linezolid
									Cefapirin	Lomefloxacin
									Cefatrizine	Lymecycline
									Cefazedone	Mecillinam
REFERENCES CDC. Antibiotic Resistance Threats in the United States, 2019. Atlanta, GA: U.S. Department of Health and Human Services, CDC. Available from: https://www.cdc.gov/drugresistance/pdf/threats-report/2019-ar-threats-report-508.pdf CDC, 2020. Antifungal Resistance. Atalanta: Centers for Disease Control and Prevention. Available from: https://www.cdc.gov/fungal/antifungal-resistance.html#wh…									Cefazolin	Meropenem
									Cefbuperazone	Meropenem-vaborbactam
									Cefcapenepivoxil	Metacycline
									Cefdinir	Metronidazole
									Cefditorenpivoxil	Mezlocillin
									Cefepime	Micronomicin
									Cefetametpivoxil	Midecamycin
									Cefixime	Minocycline
									Cefmenoxime	Moxifloxacin
									Cefmetazole	Nafcillin
									Cefminox	Neomycin
									Cefodizime	Netilmicin
									Cefonicid	Nitrofurantoin
									Cefoperazone	Norfloxacin
									Ceforanide	Ofloxacin
									Cefoselis	Oleandomycin
									Cefotaxime	Omadacycline
									Cefotetan	Oritavancin
									Cefotiam	Oxacillin
									Cefotiamhexetil	Oxytetracycline
									Cefoxitin	Panipenem
									Cefozopran	Pazufloxacin
									Cefpiramide	Pefloxacin
									Cefpirome	Penamecillin
									Cefpodoximeproxetil	Pheneticillin
									Cefprozil	Phenoxymethylpenicillin
									Cefradine	Piperacillin
									Cefroxadine	Pivampicillin
									Ceftarolinefosamil	Pivmecillinam
									Ceftazidime	Plazomicin
									Ceftazidime-avibactam	PolymyxinB
									Cefterampivoxil	Pristinamycin
									Ceftezole	Procainebenzylpenicillin
									Ceftibuten	Prulifloxacin
									Ceftizoxime	Quinupristin
									Ceftobiprolemedocaril	Ribostamycin
									Ceftolozane-tazobactam	Rifabutin
									Ceftriaxone	Rifampicin
									Cefuroxime	Rifamycin
									Chloramphenicol	Rifaximin
									Chlortetracycline	Roxithromycin
									Cilastatin	Rufloxacin
									Ciprofloxacin	Sisomicin
									Clarithromycin	Sitafloxacin
									ClavulanicAcid	Sparfloxacin
									Clindamycin	Spectinomycin
									Clofoctol	Spiramycin
									Clometocillin	Streptomycin
									Cloxacillin	Sulbactam
									Colistin	Sulbenicillin
									Dalbavancin	Sulfamethizole
									Dalfopristin	Sulfamethoxazole
									Daptomycin	Sulfametrole
									Delafloxacin	Sulfamoxole
									Dibekacin	Sultamicillin
									Dicloxacillin	Tazobactam
									Dirithromycin	Tebipenem
									Doripenem	Tedizolid
									Doxycycline	Teicoplanin
									Enoxacin	Telavancin
									Eravacycline	Telithromycin
									Ertapenem	Temocillin
									Erythromycin	Tetracycline
										Thiamphenicol
										Ticarcillin
										Tigecycline
										Tobramycin
										Tosufloxacin
										Trimethoprim
										Vaborbactam
										Vancomycin
